# Supplementary material for: Different Functional and Taxonomic Composition of the Microbiome in the Rhizosphere of Two Purslane Genotypes
Source: MDPI journal article supplement (doi:10.3390/agronomy13071795), 2023-07-04
Supplement: s1 [file s1]

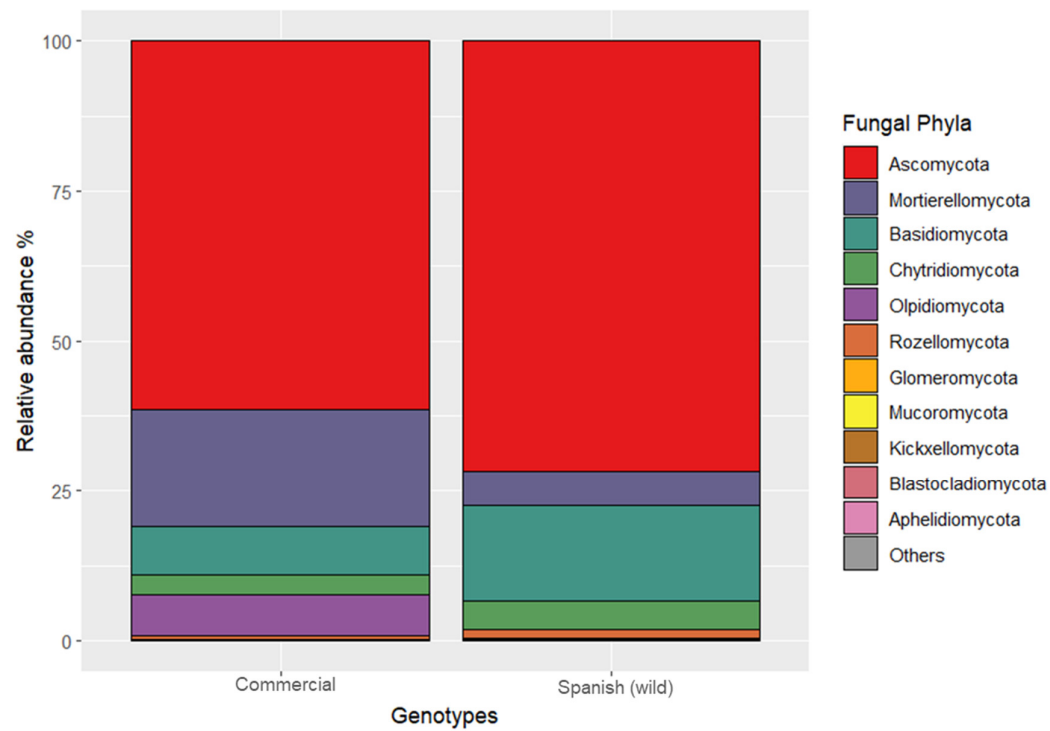

**Figure S1.** Relative abundances of the dominant fungal phyla of the rhizospheric soil of purslane from commercial and Spanish (wild) genotypes.

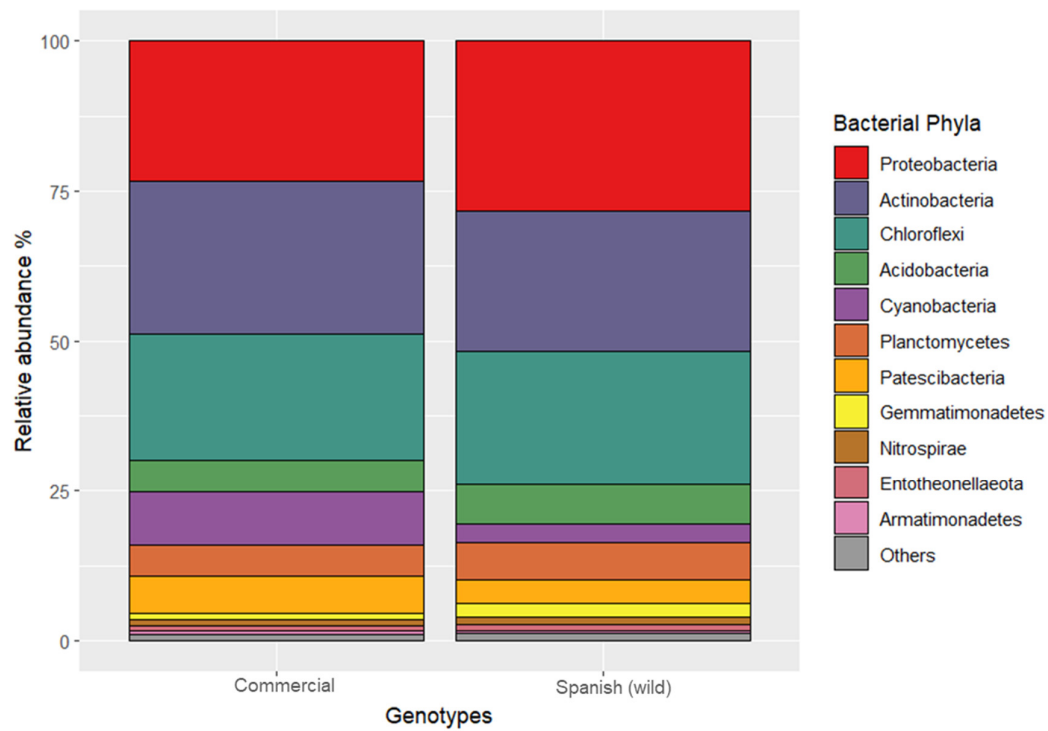

**Figure S2.** Relative abundances of the dominant bacterial phyla of the rhizospheric soil of purslane from commercial and Spanish (wild) genotypes.
